# Supplementary material for: Single-cell RNA Sequencing Reveals How the Aryl Hydrocarbon Receptor Shapes Cellular Differentiation Potency in the Mouse Colon
Source: Oxford University Press journal article supplement (doi:10.1158/1940-6207.capr-21-0378), 2021-11-22
Supplement: 19406207capr210378-sup-271149_2_supp_7533415_r2hfq2.docx [file 19406207capr210378-sup-271149_2_supp_7533415_r2hfq2.docx]

**Supplemental Figure S1**. **TdTomato expression in cells.** Top: TdTomato expression in combined WT and KO samples. Bottom: TdTomato expression in WT and KO samples shown separately.

**Supplemental Figure S2**. **Quality control metric as assessed by mitochondrial proportion (Mt DNA%).** Selection of mitochondrial Mt-ratio cutoff in TdTomato+ sorted mouse colonic crypt derived single cells.


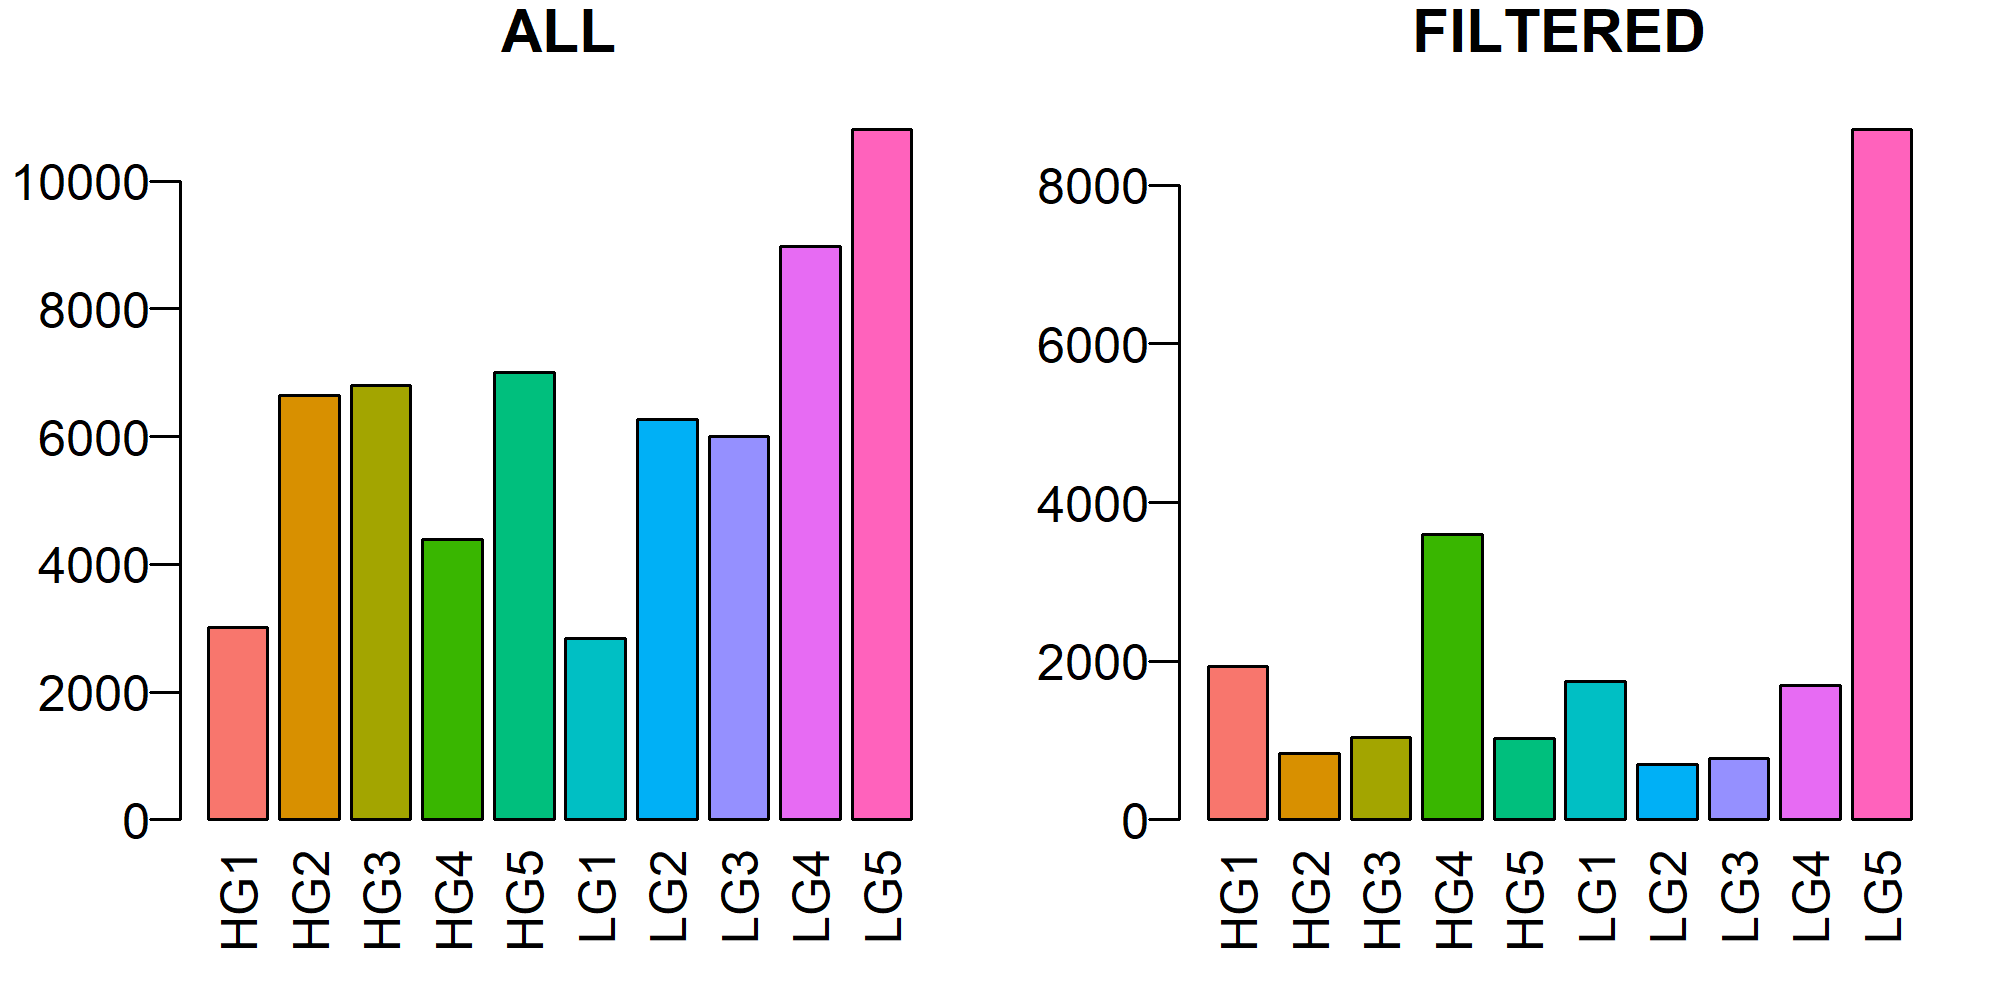


**Supplemental Figure S3**. **Numbers of cells obtained from different samples before and after the quality control filtering of scRNA-seq data.**

**Suppl. Supplemental Figure S4**. **Dot plots show normalized expression levels of Ahr target genes in WT and KO samples.**


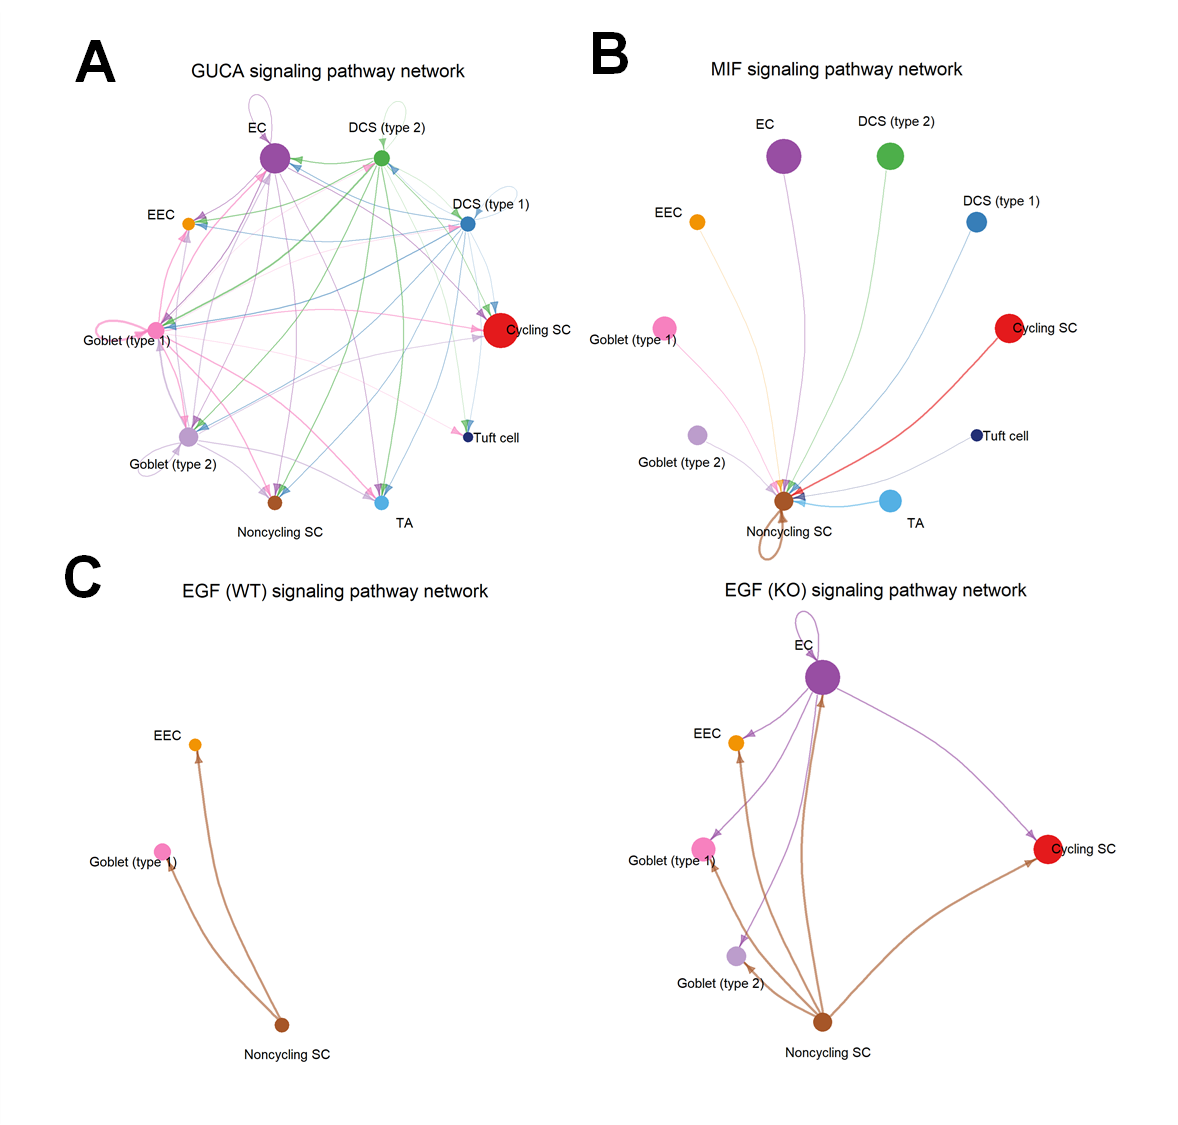


**Supplemental Figure S5**. **Interaction plots of GUCA, MIF, and EGF pathways.** (**A**) GUCA pathway in WT cells. (**B**) MIF pathway in KO cells. (**C**) EGF pathway in WT and KO cells. Cellchat implemented permutation test was used to determine the significance of interaction intensities among all cell groups. The width of edges represents the inferred strength of interactions among certain cell groups. Edge’s color is the same as the color of the corresponding sender cell type. NSC – Noncycling stem cell, CSC – Cycling stem cell, TA – Transit amplifying cell, EC – Enterocyte, EEC – Enteroendocrine cell, GL – Goblet, DCS – Deep Crypt Secretory cell, and Tuft – Tuft cell.
